# Supplementary figures and images for: Deoxyelephantopin Suppresses Pancreatic Cancer Progression In Vitro and In Vivo by Targeting linc00511/miR-370-5p/p21 Promoter Axis
Source: Hindawi journal article supplement (doi:10.1155/2022/3855462), 2022-06-25

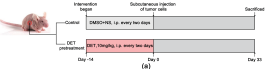

(a)

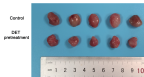

(b)

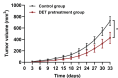

(c)

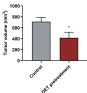

(d)

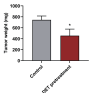

(e)

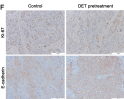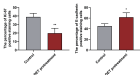

(f)

Supplement: f1 [file 3855462.f1.zip]
